# Supplementary material for: Prevalence and Trends of Isolated Systolic Hypertension among Korean Adults: the Korea National Health and Nutrition Examination Survey, 1998-2012
Source: PubMed Central journal article supplement — Korean Circ J. 2015 Nov 25;45(6):492–9. doi: 10.4070/kcj.2015.45.6.492 (PMC4661365; doi:10.4070/kcj.2015.45.6.492), 2015-11-25
Supplement: kcj-45-492-s001.pdf [file kcj-45-492-s001.pdf]

**Supplementary Table 1.** Distribution of hypertension subtypes by sex & age, 2010-2012

| Age   | Treated hypertension        |                |                             | Untreated ISH  |                             |                | Untreated IDH               |                |                             | Untreated SDH  |                             |                |
|-------|-----------------------------|----------------|-----------------------------|----------------|-----------------------------|----------------|-----------------------------|----------------|-----------------------------|----------------|-----------------------------|----------------|
|       | Weighted frequency (95% CI) | Proportion (%) |
| Total |                             |                |                             |                |                             |                |                             |                |                             |                |                             |                |
| 20-29 | 11246 (0-23332)             | 3.4            | 33009 (2380-63639)          | 10.1           | 253841 (175683-331999)      | 77.8           | 28000 (3487-52512)          | 8.6            |                             |                |                             |                |
| 30-39 | 88780 (56390-121170)        | 13.4           | 22730 (4360-41099)          | 3.4            | 396286 (316912-475661)      | 59.9           | 153478 (103077-203879)      | 23.2           |                             |                |                             |                |
| 40-49 | 582158 (482466-681850)      | 35.7           | 45729 (21789-69669)         | 2.8            | 625143 (517866-732420)      | 38.3           | 377836 (301925-453747)      | 23.2           |                             |                |                             |                |
| 50-59 | 1439592 (1287410-1591775)   | 60.4           | 242402 (188049-296755)      | 10.2           | 296727 (238989-354465)      | 12.5           | 404603 (336805-472401)      | 17.0           |                             |                |                             |                |
| 60-69 | 1661584 (1526447-1796721)   | 76.0           | 319517 (261020-378014)      | 14.6           | 58749 (37945-79553)         | 2.7            | 148395 (110757-186032)      | 6.8            |                             |                |                             |                |
| 70-79 | 1474655 (1349648-1599661)   | 83.6           | 215971 (175759-256182)      | 12.2           | 17390 (8934-25845)          | 1.0            | 59598 (38000-73997)         | 3.2            |                             |                |                             |                |
| >80   | 416657 (352537-480776)      | 83.3           | 74895 (47542-102249)        | 15             | 1350 (0-4002)               | 0.3            | 7197 (633-13760)            | 1.4            |                             |                |                             |                |
| All   | 5674671 (5358024-5991317)   | 60.0           | 954253 (841172-1067333)     | 10.1           | 1649486 (1472130-1826841)   | 17.4           | 1175506 (1048754-1302259)   | 12.4           |                             |                |                             |                |
| Men   |                             |                |                             |                |                             |                |                             |                |                             |                |                             |                |
| 20-29 | 5667 (0-13701)              | 1.9            | 31590 (1088-62092)          | 10.6           | 238246 (161521-314972)      | 80.2           | 21476 (580-42371)           | 7.2            |                             |                |                             |                |
| 30-39 | 58855 (31162-86547)         | 10.6           | 17385 (1352-33417)          | 3.1            | 353113 (279615-426611)      | 63.3           | 128370 (81955-174786)       | 23.0           |                             |                |                             |                |
| 40-49 | 338381 (265050-411713)      | 30.9           | 13095 (1133-25057)          | 1.2            | 490021 (395777-584266)      | 44.7           | 254455 (190505-318405)      | 23.2           |                             |                |                             |                |
| 50-59 | 738928 (636503-841352)      | 56.3           | 110553 (67915-153191)       | 8.4            | 199597 (151994-247201)      | 15.2           | 263832 (203177-324486)      | 20.1           |                             |                |                             |                |
| 60-69 | 736850 (656457-817244)      | 72.8           | 128195 (96140-160250)       | 12.7           | 41346 (24829-57863)         | 4.1            | 105137 (71794-138480)       | 10.4           |                             |                |                             |                |
| 70-79 | 510011 (446395-573627)      | 81.5           | 82393 (57855-106932)        | 13.2           | 9279 (2898-15659)           | 1.5            | 24445 (13748-35141)         | 3.9            |                             |                |                             |                |
| >80   | 99076 (71974-126178)        | 78.2           | 25946 (11088-40804)         | 20.5           | 1350 (0-4002)               | 1.1            | 334 (0-990)                 | 0.3            |                             |                |                             |                |
| All   | 2487767 (2310348-2665187)   | 49.5           | 409157 (335216-483099)      | 8.1            | 1332953 (1174987-1490919)   | 26.5           | 798049 (686784-909314)      | 15.9           |                             |                |                             |                |
| Women |                             |                |                             |                |                             |                |                             |                |                             |                |                             |                |
| 20-29 | 5579 (0-14609)              | 19.2           | 1419 (0-4207)               | 4.9            | 15595 (1175-30014)          | 53.6           | 6524 (0-19340)              | 22.4           |                             |                |                             |                |
| 30-39 | 29925 (12186-47665)         | 28.9           | 5345 (0-14311)              | 5.2            | 43173 (22854-63493)         | 41.7           | 25108 (5283-44933)          | 24.2           |                             |                |                             |                |
| 40-49 | 243777 (187571-299982)      | 45.6           | 32634 (12118-53151)         | 6.1            | 135122 (92046-178198)       | 25.3           | 123381 (84311-162450)       | 23.1           |                             |                |                             |                |
| 50-59 | 700665 (611761-789568)      | 65.5           | 131849 (98094-165604)       | 12.3           | 97130 (66202-128057)        | 9.1            | 140771 (106074-175469)      | 13.2           |                             |                |                             |                |
| 60-69 | 924733 (833065-1016401)     | 78.6           | 191322 (148436-234207)      | 16.3           | 17402 (4909-29896)          | 1.5            | 43258 (25613-60902)         | 3.7            |                             |                |                             |                |
| 70-79 | 964644 (867751-1061536)     | 84.8           | 133577 (102775-164379)      | 11.7           | 8111 (2348-13874)           | 0.7            | 31554 (16268-46839)         | 2.8            |                             |                |                             |                |
| >80   | 317581 (262585-372577)      | 85.1           | 48950 (25582-72317)         | 13.1           | 0                           | 0              | 6863 (332-13394)            | 1.8            |                             |                |                             |                |
| All   | 3186903 (2978602-3395204)   | 72             | 545095 (469112-622078)      | 12.3           | 316533 (253650-379415)      | 7.2            | 377457 (317712-437203)      | 8.5            |                             |                |                             |                |

ISH: isolated systolic hypertension, IDH: isolated diastolic hypertension, SDH: systolic and diastolic hypertension, CI: confidence interval
