# Supplementary material for: Prevalence and Trends of Isolated Systolic Hypertension among Korean Adults: the Korea National Health and Nutrition Examination Survey, 1998-2012
Source: PubMed Central journal article supplement — Korean Circ J. 2015 Nov 25;45(6):492–9. doi: 10.4070/kcj.2015.45.6.492 (PMC4661365; doi:10.4070/kcj.2015.45.6.492), 2015-11-25
Supplement: kcj-45-492-s002.pdf [file kcj-45-492-s002.pdf]

**Supplementary Table 2.** Age-standardized trends of hypertension subtypes (age $\geq$ 20), 1998–2012

| Year  | Treated hypertension<br>Proportion (%) | Untreated ISH<br>Proportion (%) | Untreated IDH<br>Proportion (%) | Untreated SDH<br>Proportion (%) | Prevalence of hypertension<br>(95% CI) |
|-------|----------------------------------------|---------------------------------|---------------------------------|---------------------------------|----------------------------------------|
| Total |                                        |                                 |                                 |                                 |                                        |
| 1998  | 21.5                                   | 27.4                            | 19.7                            | 31.4                            | 25.7 (24.5–27.0)                       |
| 2001  | 30.9                                   | 21.0                            | 21.5                            | 26.6                            | 24.4 (23.0–25.8)                       |
| 2005  | 47.5                                   | 10.7                            | 23.7                            | 18.1                            | 22.8 (21.5–24.1)                       |
| 2007  | 57.6                                   | 10.9                            | 18.3                            | 13.2                            | 19.9 (18.2–21.6)                       |
| 2008  | 58.8                                   | 7.6                             | 22.3                            | 11.3                            | 21.2 (20.2–22.3)                       |
| 2009  | 57.8                                   | 10.2                            | 20.7                            | 11.3                            | 21.4 (20.4–22.5)                       |
| 2010  | 60.3                                   | 10.2                            | 18.4                            | 11.1                            | 21.8 (20.6–22.9)                       |
| 2011  | 55.2                                   | 8.7                             | 21.0                            | 15.1                            | 24.0 (22.8–25.2)                       |
| 2012  | 56.8                                   | 10.5                            | 20.3                            | 12.3                            | 23.9 (22.4–25.5)                       |
| Men   |                                        |                                 |                                 |                                 |                                        |
| 1998  | 14.2                                   | 23.2                            | 27.8                            | 34.8                            | 28.2 (26.0–30.4)                       |
| 2001  | 22.6                                   | 19.7                            | 29.3                            | 28.4                            | 28.2 (26.0–30.4)                       |
| 2005  | 36.7                                   | 8.0                             | 35.3                            | 20.1                            | 26.1 (24.2–28.0)                       |
| 2007  | 49.5                                   | 10.3                            | 25.2                            | 14.9                            | 21.8 (19.2–24.5)                       |
| 2008  | 47.8                                   | 5.9                             | 33.0                            | 13.4                            | 23.0 (21.4–24.5)                       |
| 2009  | 47.3                                   | 7.1                             | 31.5                            | 14.1                            | 25.0 (23.3–26.7)                       |
| 2010  | 49.4                                   | 8.9                             | 27.9                            | 13.8                            | 24.2 (22.3–26.1)                       |
| 2011  | 44.4                                   | 5.8                             | 31.9                            | 17.9                            | 28.7 (26.9–30.5)                       |
| 2012  | 44.6                                   | 8.8                             | 30.0                            | 16.4                            | 27.1 (24.8–29.4)                       |
| Women |                                        |                                 |                                 |                                 |                                        |
| 1998  | 29.4                                   | 32.2                            | 10.6                            | 27.8                            | 20.1 (18.6–21.6)                       |
| 2001  | 40.0                                   | 22.7                            | 12.4                            | 25.0                            | 20.1 (18.6–21.6)                       |
| 2005  | 60.9                                   | 13.9                            | 9.3                             | 15.9                            | 18.9 (17.5–20.3)                       |
| 2007  | 68.5                                   | 12.2                            | 8.4                             | 10.9                            | 17.5 (15.5–19.5)                       |
| 2008  | 71.5                                   | 9.5                             | 9.8                             | 9.2                             | 19.0 (17.9–20.2)                       |
| 2009  | 70.9                                   | 14.1                            | 7.2                             | 7.8                             | 17.6 (16.4–18.9)                       |
| 2010  | 73.6                                   | 11.6                            | 6.2                             | 7.8                             | 18.9 (17.8–20.0)                       |
| 2011  | 68.6                                   | 12.5                            | 7.5                             | 11.5                            | 18.9 (17.7–20.1)                       |
| 2012  | 70.6                                   | 12.8                            | 9.5                             | 7.1                             | 20.4 (18.7–22.1)                       |

Age-standardized with estimated population of year of 2005. ISH: isolated systolic hypertension, IDH: isolated diastolic hypertension, SDH: systolic and diastolic hypertension, CI: confidence interval
